# Supplementary material for: Synthesis of nitric oxide probes with fluorescence lifetime sensitivity
Source: Royal Society of Chemistry journal article supplement (doi:10.1039/c3ob41498a), 2013-01-01

# Synthesis of nitric oxide probes with fluorescence lifetime sensitivity

Natalia G. Zhegalova, Garrett Gonzales, Mikhail Y. Berezin\*

Department of Radiology, Washington University in St. Louis School of Medicine  
berezinm@mir.wustl.edu

## Contents

|                                                                                                                                                   |   |
|---------------------------------------------------------------------------------------------------------------------------------------------------|---|
| Figure S1 Absorption and emission spectra of DAP-LT2 before and after treatment with DEA NONOate .....                                            | 2 |
| Figure S2 Binding constant of DAP-LT1 to albumin.....                                                                                             | 2 |
| Figure S3 Fluorescence lifetime decays of DAP-LT1 before and after treatment with DEA NONOate.....                                                | 3 |
| Figure S4 Fluorescence lifetime decays of DAP-LT1 before and 5 min after treatment with DEA NONOate and the decays of entry 11. All at 37 °C..... | 3 |
| Figure S5 Fluorescence decays of DAP-LT2 before and after reaction with NO .....                                                                  | 4 |
| <sup>1</sup> H NMR DAP-LT1, CD <sub>3</sub> OD .....                                                                                              | 5 |
| <sup>13</sup> C NMR DAP-LT1, CD <sub>3</sub> OD .....                                                                                             | 5 |
| <sup>1</sup> H NMR DAP-LT2, CD <sub>3</sub> OD.....                                                                                               | 6 |
| <sup>13</sup> C NMR DAP-LT2, CD <sub>3</sub> OD .....                                                                                             | 6 |
| <sup>1</sup> H NMR Benzotriazole dye 11, CD <sub>3</sub> OD.....                                                                                  | 7 |
| <sup>13</sup> C NMR Benzotriazole dye 11, CD <sub>3</sub> OD .....                                                                                | 7 |

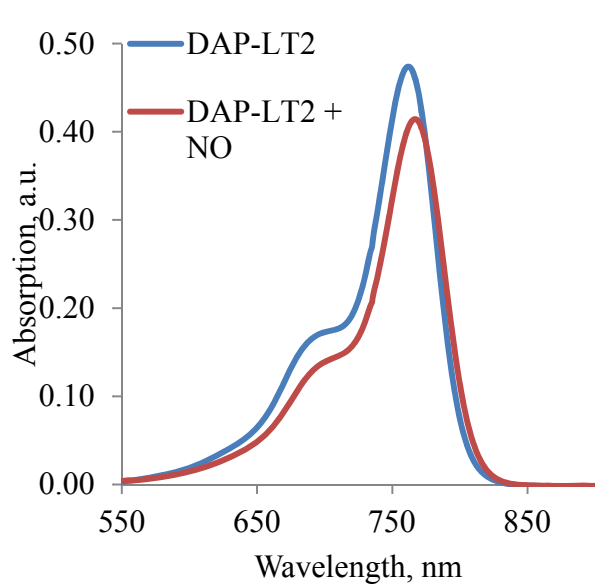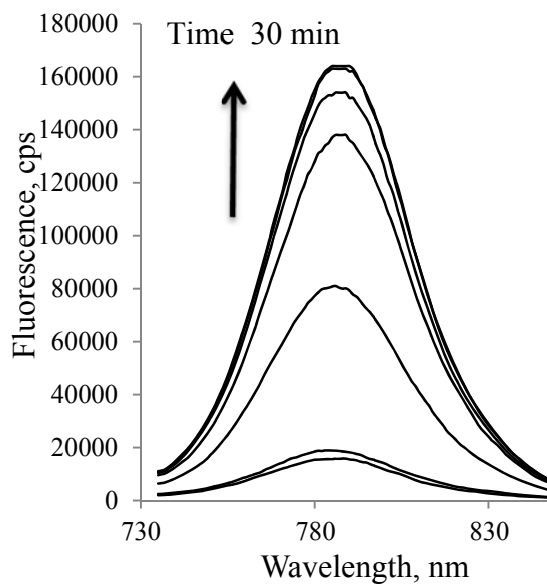

**Figure S1** Absorption and emission spectra of DAP-LT2 before and after treatment with DEA  
NONOate

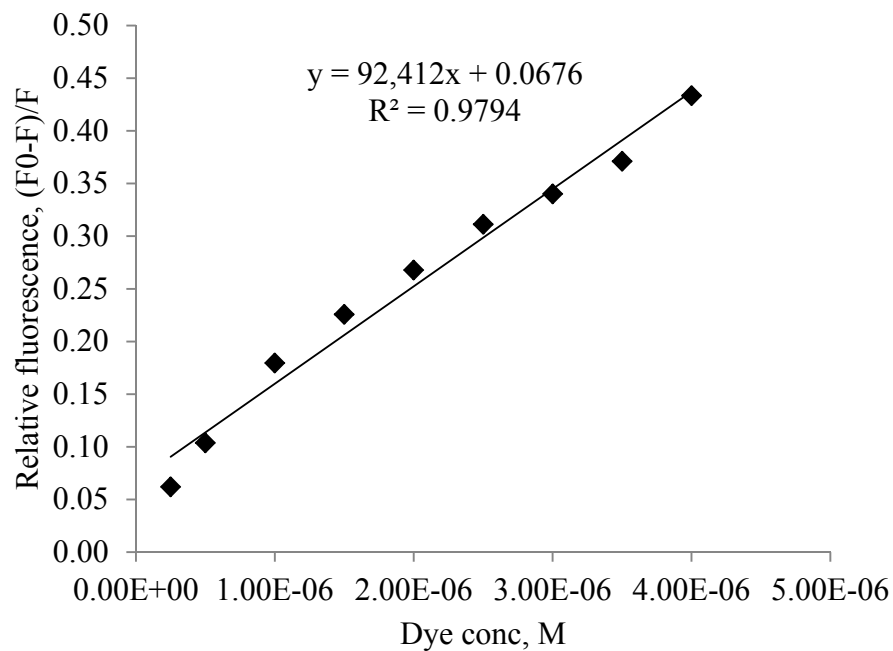

**Figure S2** Binding constant of DAP-LT1 to albumin

Ex/em: 279/345 nm, BSA concentration  $1.4 \times 10^{-6}$  M in PBS. The slope of the trend lines corresponds to the binding constants for DAP-LT1  $\sim 92,400 \text{ M}^{-1}$ .

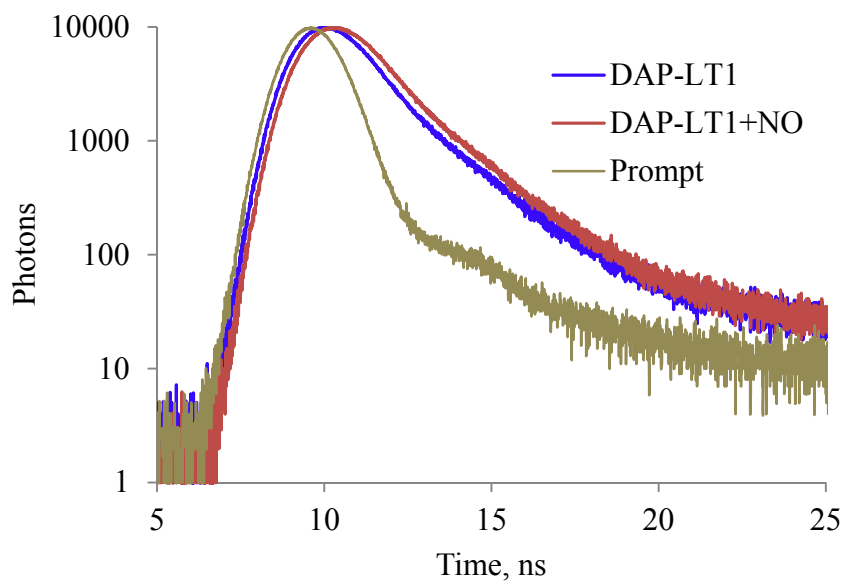

**Figure S3 Fluorescence lifetime decays of DAP-LT1 before and after treatment with DEA NONOate**

Ex/em 740/790 nm. 10% serum/PBS buffer

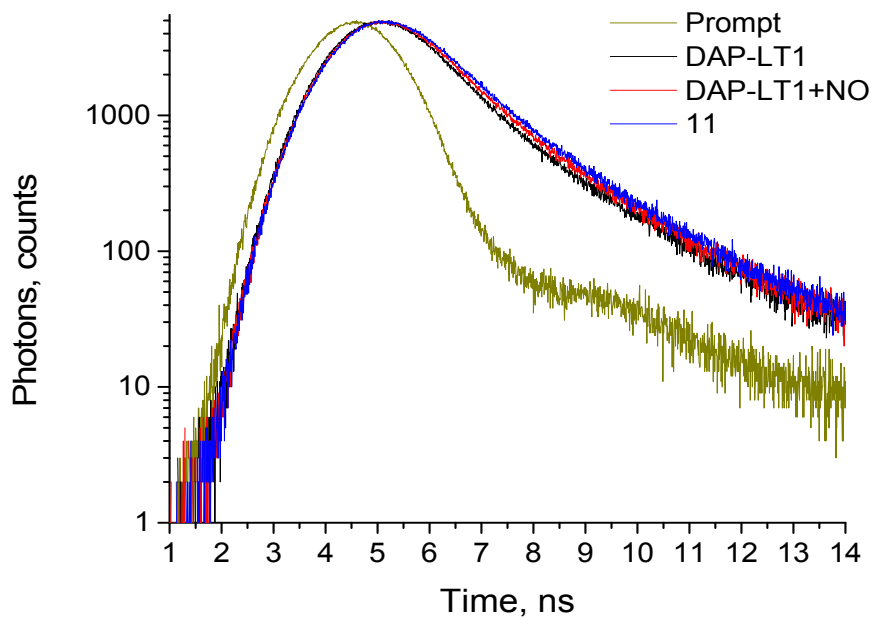

**Figure S4 Fluorescence lifetime decays of DAP-LT1 before and 5 min after treatment with DEA NONOate and the decays of entry 11. All at 37 °C**

Ex/em 740/790 nm. 10% serum/PBS buffer. Mean lifetime: DAP-LT1 ~ 0.94 ns, DAP-LT1+NO donor (5 min) ~ 1.02 ns and entry 11 ~ 1.09 ns.

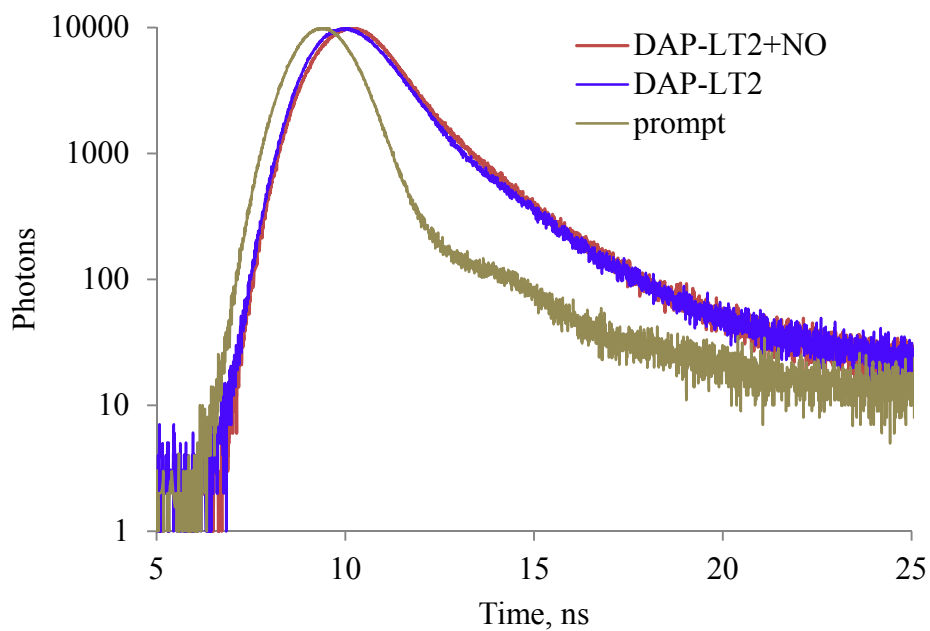

**Figure S5 Fluorescence decays of DAP-LT2 before and after reaction with NO**

The change in fluorescence lifetime was from 1.02 to 1.05 ns. Ex/em. 740/790 nm, 10% serum/PBS buffer, room temperature

### *1H* NMR DAP-LT1, CD<sub>3</sub>OD

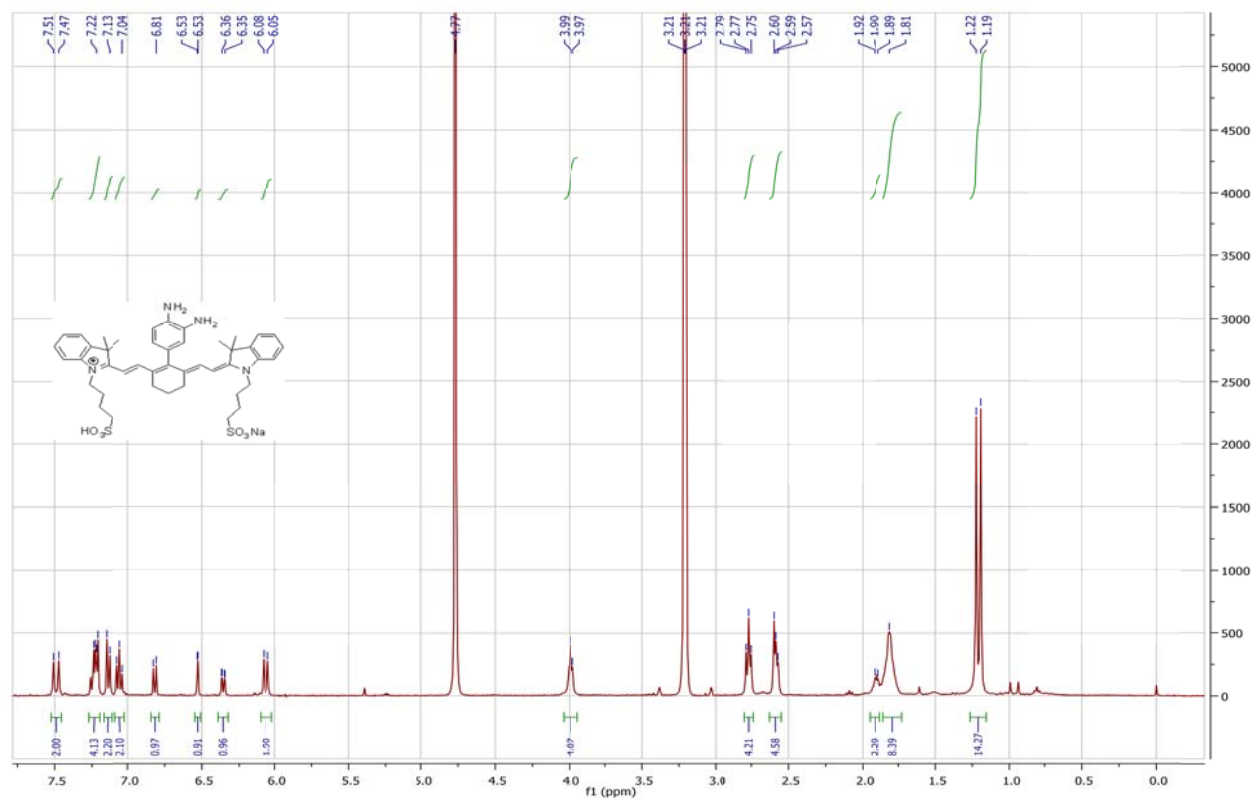

### *13C* NMR DAP-LT1, CD<sub>3</sub>OD

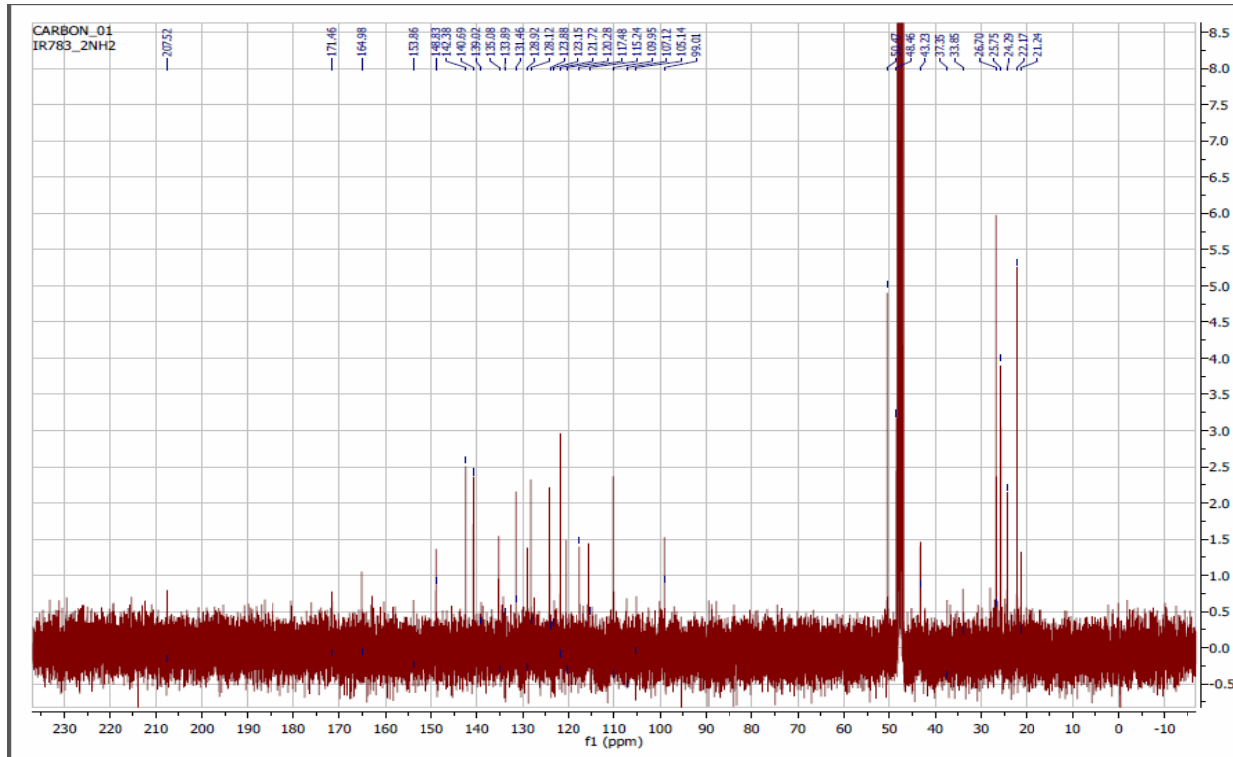

### ***<sup>1</sup>H NMR DAP-LT2, CD<sub>3</sub>OD***

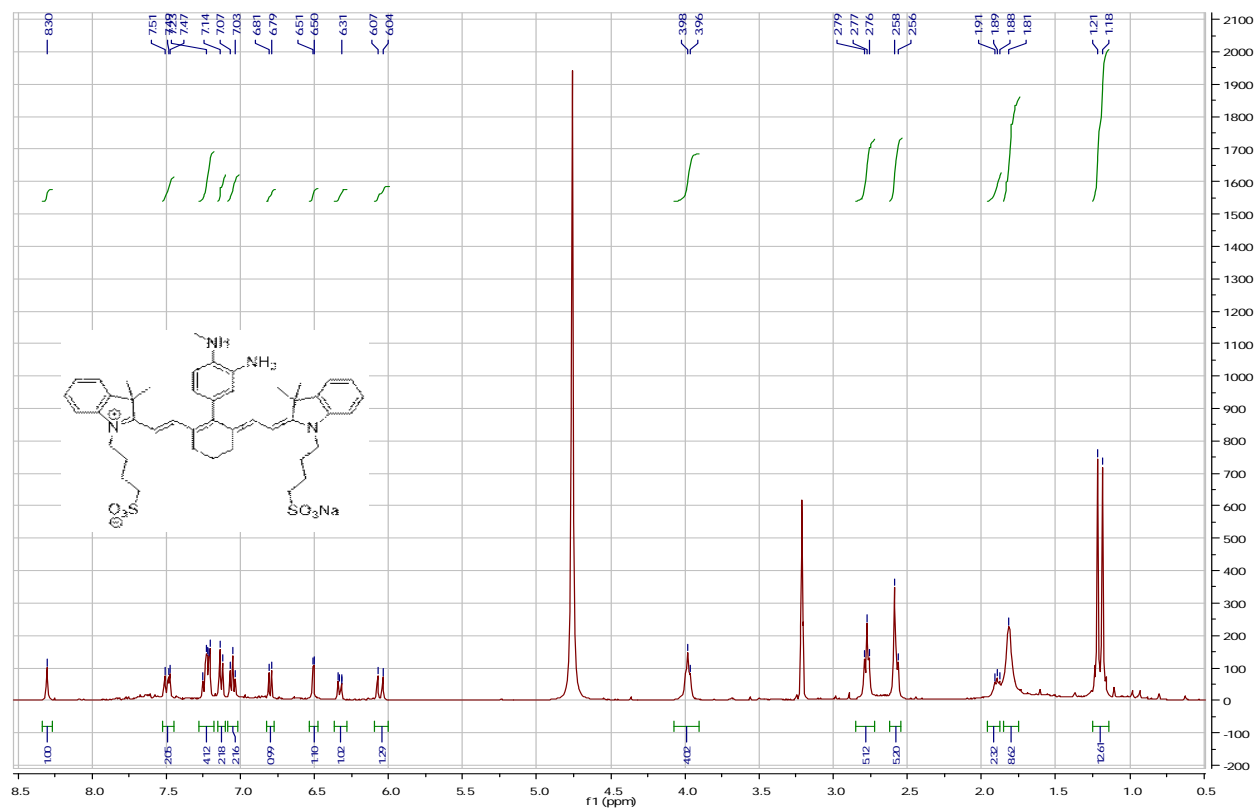

### ***<sup>13</sup>C NMR DAP-LT2, CD<sub>3</sub>OD***

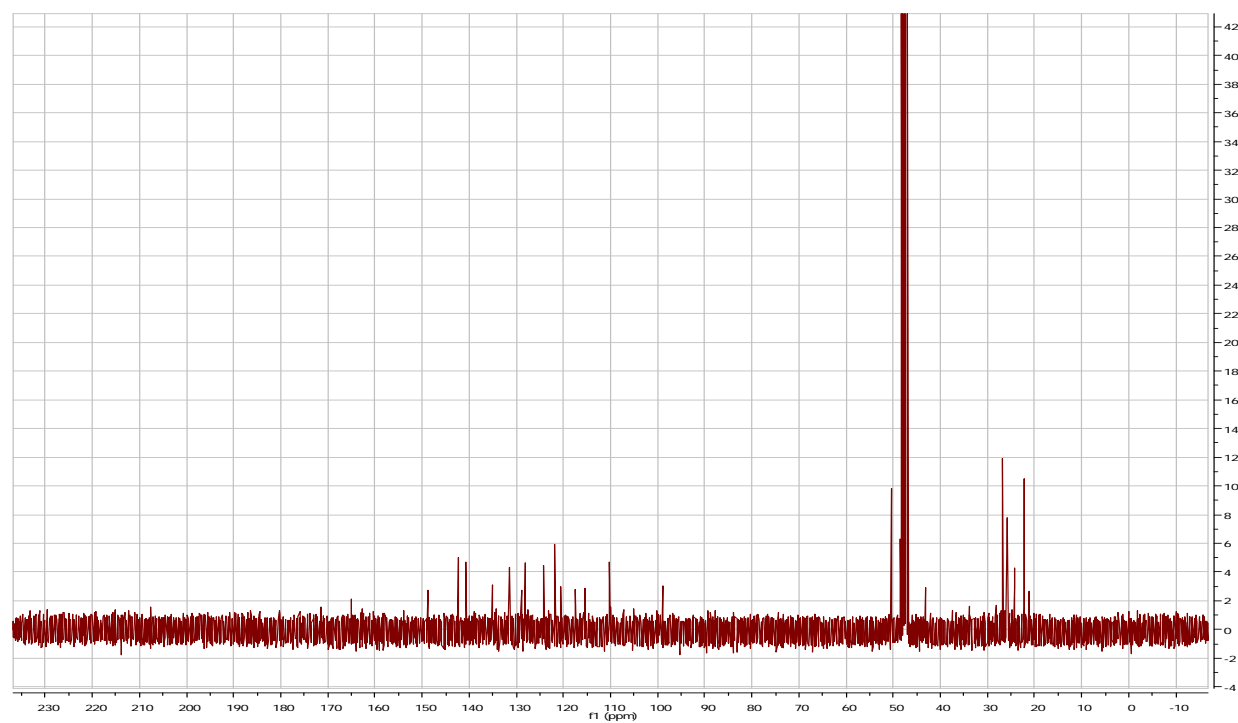

### *1H* NMR Benzotriazole dye 11, CD<sub>3</sub>OD

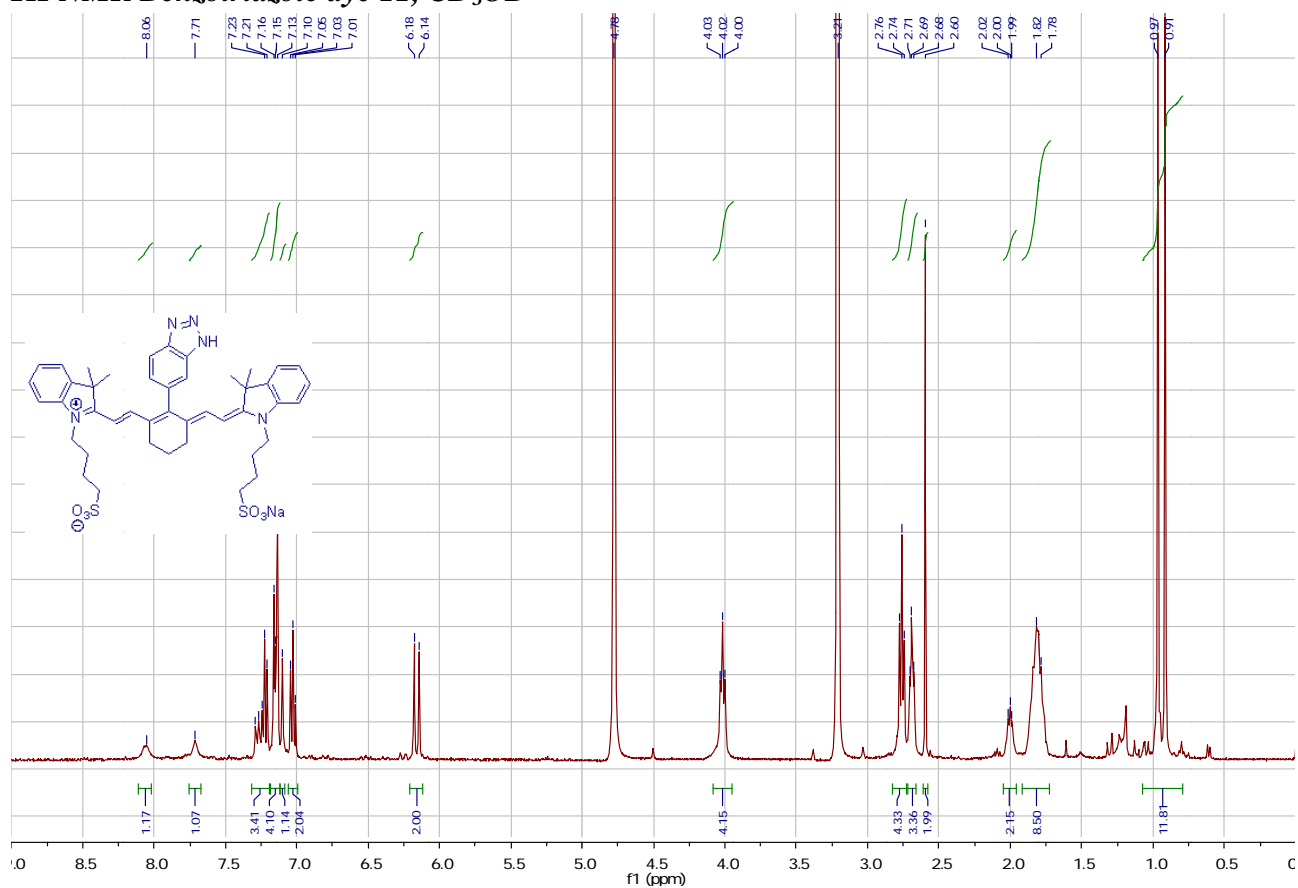

### *13C* NMR Benzotriazole dye 11, CD<sub>3</sub>OD

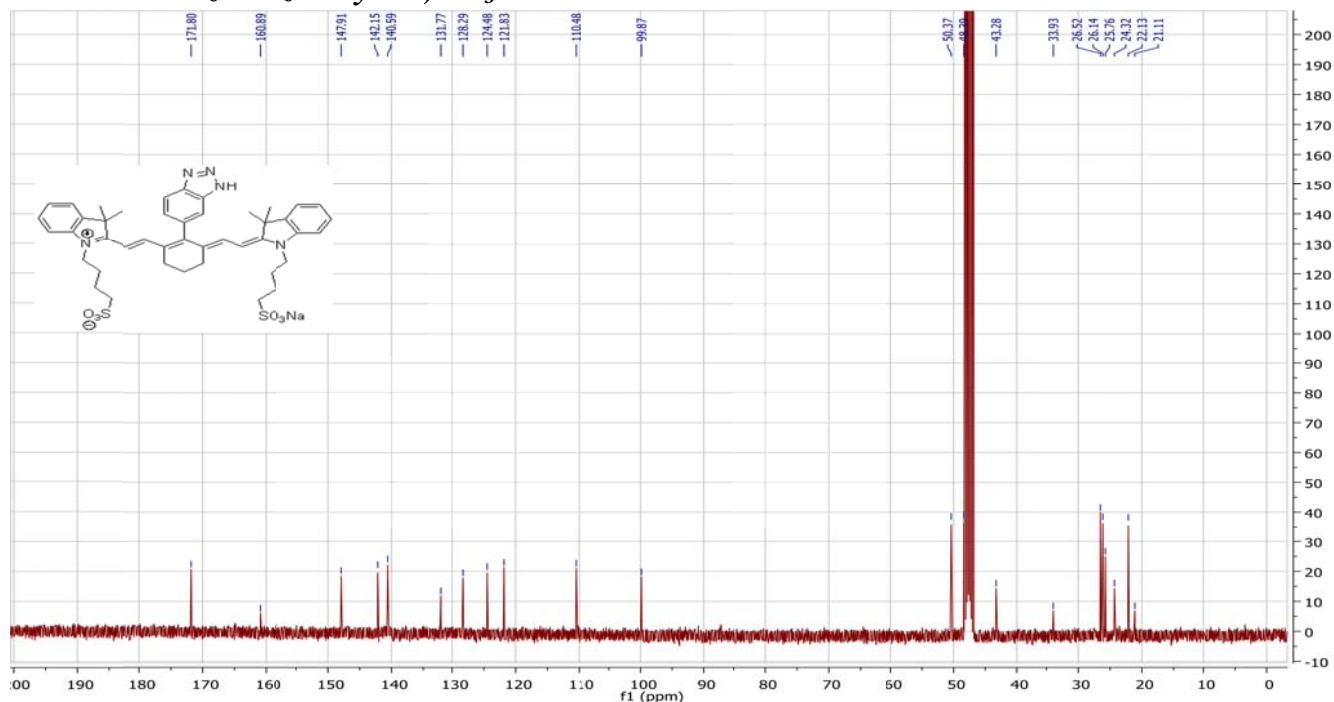

Supplement: c3ob41498a.pdf [file c3ob41498a.pdf]
